## RESEARCH ARTICLE

## Sanitation, water, energy use, and traffic volume affect environmental quality: Go-for-green developmental policies

Luqman Khalil<sup>1</sup>, Shujaat Abbas<sup>2</sup>, Kamil Hussain<sup>3</sup>, Khalid Zaman<sup>4\*</sup>, Iswan<sup>5</sup>, Hailan Salamun<sup>6</sup>, Zainudin Bin Hassan<sup>7</sup>, Muhammad Khalid Anser<sup>8,9</sup>

**1** Department of Economics, Government Post Graduate College No. 1, Abbottabad, KPK, Pakistan, **2** Graduate School of Economics and Management, Ural Federal University, Yekaterinburg, Russian Federation, **3** Department of Management Sciences, University of Wah, Wah Cantt, Pakistan, **4** Department of Economics, The University of Haripur, Haripur, Khyber Pakhtunkhwa, Pakistan, **5** Education Faculty, University of Muhammadiyah Jakarta, South Jakarta, Indonesia, **6** Department of Nationhood and Civilization, Centre for Fundamental and Continuing Studies (PPAL), Universiti Malaysia Terengganu (UMT), Kuala Nerus, Terengganu, Malaysia, **7** School of Education, Faculty of Social Sciences and Humanities, Universiti Teknologi Malaysia (UTM), Skudai, Johor Bahru, Malaysia, **8** School of Public Administration, Xi'an University of Architecture and Technology, Xi'an, China, **9** Faculty of Business and Management Sciences, The Superior University, Lahore, Pakistan

✉ These authors contributed equally to this work.

\* [khalid\\_zaman786@yahoo.com](mailto:khalid_zaman786@yahoo.com)

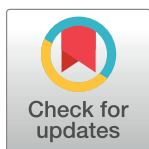

## OPEN ACCESS

**Citation:** Khalil L, Abbas S, Hussain K, Zaman K, Iswan, Salamun H, et al. (2022) Sanitation, water, energy use, and traffic volume affect environmental quality: Go-for-green developmental policies. PLoS ONE 17(8): e0271017. <https://doi.org/10.1371/journal.pone.0271017>

**Editor:** Jun Yang, Northeastern University (Shenyang China), CHINA

**Received:** March 10, 2022

**Accepted:** June 21, 2022

**Published:** August 26, 2022

**Copyright:** © 2022 Khalil et al. This is an open access article distributed under the terms of the [Creative Commons Attribution License](https://creativecommons.org/licenses/by/4.0/), which permits unrestricted use, distribution, and reproduction in any medium, provided the original author and source are credited.

**Data Availability Statement:** The data is freely available at World Bank (2021) at <https://databank.worldbank.org/source/world-development-indicators>.

**Funding:** The funders had no role in study design, data collection and analysis, decision to publish, or preparation of the manuscript.

**Competing interests:** The authors have declared that no competing interests exist.

## Abstract

Carbon emissions are primarily the result of human activity in urban areas. Inadequate sanitary facilities, contaminated drinking water, nonrenewable energy, and high traffic congestion have all impacted the natural ecosystem. Using data from 1975 to 2019, the study assessed the impact of the aforementioned variables on Pakistan's carbon emissions in light of this crucial fact. The ARDL cointegration method was used to estimate the short- and long-run parameter estimates. Urban sanitation challenges and energy consumption increase carbon emissions, which affects the natural environment by raising a country's carbon intensity. Economic expansion confirmed the inverted U-shaped relationship between carbon emissions and economic growth to verify the Environmental Kuznets Curve (EKC) hypothesis in the long run. In contrast, the monotonically rising function of carbon emissions provides evidence of the nation's economic development in the short run. Access to clean drinking water improves population health and encourages the purchase of eco-friendly products. The government must improve sanitation services and use renewable energy sources to enhance air quality.

## 1. Introduction

The continuation of hygienic conditions in urban areas is linked to urban sanitation, and city sanitation is a far more intricate system [1]. Cleanliness is a recurring issue in slums, as crowded conditions and a lack of cleanliness lead to disease outbreaks that imperil shantytown inhabitants while exposing other city residents to health risks [2]. The goals of urban sanitation

are to reduce the risk to human health by addressing the factors that might cause health issues [3]. Poor sanitation is linked to the spread of illnesses that harm public health. The United Nations General Assembly recognized uncontaminated drinking water and hygiene as fundamental human rights in 2010 and called for worldwide efforts to help nations provide safe, fresh, controllable, and acceptable drinking water and cleanliness [4]. Target 6.2 of the Sustainable Development Goals calls for adequate and safe sanitation for all [5]. According to WHO [6] research, over 830,000 people die each year in low- and middle-income countries due to a faulty hygiene system, accounting for more than 60% of all diarrheal deaths. In addition, only 45 percent of the population used basic sanitation in 2017, and 2.2 billion people lacked access to non-toxic drinking water. Almost 4 billion people do not have a safe location to use a toilet.

Pakistan met the MDG for sanitation in 2015, lowering the proportion of people who lack balanced access to basic hygiene by half. Growing access to sanitation in rural areas accounts for 67 percent of the total in 2019, more than three times in 1991. As a result, about one-fourth of individuals in communities practice open defecation. Almost no money has been spent on mud or wastewater management. In rural Punjab, 42 percent of houses lack a drainage system, while 60 percent in rural KP lack one. In rural Punjab and KP, 1% and 10% have decent sanitation infrastructure. Sewer-connected toilets are available to more than 40% of urban KPK residents and almost 60% of urban Punjab residents. The relationship between toilets and sanitation is an essential indicator of safety measures [7, 8]. The availability of water, sanitation, and cleaning amenities vary between and within the KPK and Punjab areas. Approximately 90% and 85% of the populace now have safer water supplies and sanitation services, respectively [9]. Similarly, 94 percent of people have improved water sources in the Punjab region, and 72 percent have improved sanitation facilities [10]. There are significant differences between urban and rural regions at the district level within provinces. In 2015, UNICEF said that disparities should be reduced to achieve global sanitation [11].

As the complexity of contemporary living increased, so did energy usage. The notion of smart cities as creative hubs cannot be imagined without substantial use of various types of energy [12–14]. The need for energy is a crucial fuel for contemporary economies to function. EUSE is required for the operation of our companies, the lighting of our streets, and the powering of our automobiles [15, 16]. The combination of industrial growth and population growth has led to an unprecedented increase in energy use [17, 18]. Countries are working to keep the energy supply stable. The scarcity of energy has hampered economic development and lowered living standards [19–21]. Energy use is directly proportional to CO<sub>2</sub> emissions. Since Rachel Carson's book "Silent Spring" in 1962, which examines the consequences of biological variety, ecological concerns have gained prominence [22].

ICT penetration has expanded in underdeveloped countries, yet infrastructure and affordability are lacking. To stimulate ICT infrastructure investment, create and deploy modern information systems, leverage the financial sector to finance ICT projects at a reasonable interest rate, and encourage community demand on politicians to minimize unsustainable practices through strengthening e-government infrastructure [23]. Today, one of the most significant global issues is attempting to bring the carbon pollution linked to increasing temperatures under control. To correctly manage economic and environmental resources, it is necessary to have a solid understanding of governance processes that consider the interconnected nature of environmental, social, and governance issues [24]. Countries should strengthen energy collaboration and consolidate national energy activities by balancing the critical components of the global energy paradox to aid in developing a well-balanced energy system [25]. Energy generation contributes to the ongoing easing of suffering and recommends feed-in pricing, tax credits, and the diversification of energy resources away from fossil fuels and toward renewable power sources [26]. The lack of available energy increases environmental stress. However, the

advancement of education had a significant effect on sustainable development that contributed to globalization [27].

The generally accepted EKC theory links economic growth and environmental deprivation [28–30]. The notion of EKC emerged in the early 1990s due to Grossman and Krueger's pioneering work and the World Bank's development report [31]. Economic growth and ecological security are dynamically linked by an intertemporal restriction caused by the negative impact of pollutants on production. The EKC Hypothesis, which establishes an inverted U-shaped relationship between production and ecological quality, finds a significant correlation between environmental deterioration and growth in economic activity [32, 33]. Economic growth causes environmental degradation in low-income countries, but it reduces environmental impact in technologically advanced countries [34–36]. The link between energy use and increased economic interest concerns energy consumption and ecological issues [37] since environmental pollution is a severe issue caused by traditional energy sources. To a certain extent, conventional energy usage can disclose the current state of local environmental stress. Industrial actions substantially increased traffic and mono-nitrogen oxide (NO<sub>x</sub>) emissions across states. Trade volume, energy use, and food variability per capita are all tied to air pollutants that degrade the natural environment [38–40].

Based on the discussions, the study offered a series of research questions to be addressed in order to derive certain policy conclusions, first, whether insufficient urban sanitation causes a country's high carbon intensity? The question is critical for analyzing the country's sanitary infrastructure, which leads to the country's environmental requirements. The second question is whether access to clean drinking water helps to enhance healthcare facilities, hence reducing environmental problems? The question was about contaminated and unsanitary drinking water, which caused many ailments, weakened the immune system and was most likely caused by environmental pollution. As a result, having access to safe drinking water is beneficial in resolving healthcare concerns and related environmental dangers in a country. Finally, does sustained economic expansion, nonrenewable energy fuels, and high traffic volume raise the cost of a country's carbon emissions? The matter is critical since significant carbon emissions from the country's commercial projects feed economic activity with nonrenewable fuels and high traffic volume. To lessen the negative impact of environmental externalities on the country, it is critical to move toward sustainable development projects paired with green energy sources and electric automobiles. The study presented the following research objectives in line with the research questions:

- i. To look at how urban sanitation, clean drinking water, and energy use affect carbon emissions in a country.
- ii. To determine how high-volume traffic affects carbon emissions in a country when the EKC hypothesis is in place.
- iii. To investigate the function of continued economic growth in reducing carbon emissions.

It helps make long-term policy suggestions when the results are compared with the goals. Various statistical tools are used to do this.

The significance of the research lies in its contribution to developing a resilient metropolitan system supported by clean drinking water, hygienic conditions, and a sustainable transportation system. Pakistan's economy is supported by abundant valuable environmental and natural resources, which contribute to the country's economic prosperity. However, the nation faced various additional difficulties relating to clean drinking water and urban sanitation services, which directly impacted the sustainability agenda for healthcare. In addition, increased energy use and transportation emissions threaten the green development goal, which requires

a sustainable policy mix. Based on the issue, the study evaluated the given concerns and proposed sound policy inferences to improve the country's natural environment and pave the way for green development.

## 2. Literature review

The massive increase in carbon output levels has prompted authorities to develop green and clean energy regulations. The prior research mainly examined several variables that reduce carbon emissions to pre-industrial levels [41, 42]. However, the ambition of reducing carbon emissions is still a long way from being a reality. The significant rural-urban migration places an immense strain on urban sanitation infrastructure, impacting the physical environment. The increased carbon emissions were exacerbated by inadequate sanitary facilities, resulting in increased healthcare costs. Willcock et al. [43] investigated the value of nature's sanitation services. Human waste is channeled through nature and treated by plants, and nature cleanses over 42 million tonnes of human waste each year, a USD 4.4 billion services. Using data from 1972 to 2014, Ali et al. [44] investigated the relationship between CO<sub>2</sub> emissions and urbanization in Pakistan. They discovered that urbanization increases CO<sub>2</sub> emissions in both the long and short term. The increased requirement for urban planning and infrastructure development is critical to reducing a country's negative environmental consequences. From 1970 to 2015, Liu and Bae [45] investigated the impact of industrial expansion and urban sprawl on carbon emissions in China. They discovered a substantial, long-term relationship between the alleged elements. Bekhet and Othman [46] discovered that early phases of urbanization (URB) had a detrimental influence on Malaysia's environmental quality; however, it improves as the game progresses. Dogan and Turkekul [47] investigated the relationship between CO<sub>2</sub> emissions, real GDP, energy use, free trade, urbanization, and financial development in the United States from 1960 to 2010. The study's findings indicated that urbanization reduced green value in the long run, but two-way causal relationships were discovered in the short run. The other aspects must be carefully considered during policy proposals. Tyagi et al. [48] researched the causes and implications of environmental degradation. They discovered that minimizing exposure to environmental risk concerns increases air quality and offers better-quality drinking and cleaning water and sanitation sources. Clean energy has been linked to several health advantages. It is determined to make a significant contribution to the Millennium Development Goals. The link between urbanization and CO<sub>2</sub> emissions in MENA economies was studied by Al-Mulali et al. [49]. The study's outcomes suggest that urbanization positively impacts energy consumption and CO<sub>2</sub> emissions. They claimed that urbanization increased energy use, especially fossil fuels, resulting in pollution.

Researchers investigating the link between energy use and economic development came with contradictory findings. Kraft and Kraft [50] demonstrated a one-way causality between energy usage and GDP and validated the conservation hypothesis using the years 1947–1974. According to the findings, energy usage significantly influences a country's growth. Soytaş and Sari [51] used data from 1950 to 1992 to support the conservation hypothesis in Japan, Germany, Turkey, and France, implying that economic expansion leads to massive energy consumption. The Argentineans verified the energy usage and production feedback, and Italy and Korea adopted the growth concept. Streimikiene and Kasperowicz [52] validated the energy-led growth postulate in a panel of 18 nations to support green growth initiatives. Gorus and Aydın [53] examined the relationship between energy usage, economic development, and CO<sub>2</sub> emissions in MENA countries using panel data from 1975 to 2014. The findings indicate that energy management strategies boost economic growth, but their long-term repercussions are the opposite. Furthermore, no relationship exists between economic growth and carbon

emissions. Legislators can enact CO<sub>2</sub> emission controls and other ways to reduce pollution in the atmosphere. Using data from 249 Chinese cities in 2015, Xie et al. [54] evaluated if the EKC hypothesis holds between economic growth and pollution in China. The study employed a nonlinear spatial autoregressive model for the investigation. The results showed that PM<sub>2.5</sub> pollutants have significant positive geographical spillover characteristics. They suggested that local governments modify the industrial structure to accommodate lower-income cities and encourage green industries. Zhang et al. [55] analyzed carbon emissions from Chinese transportation. The economic, technological, and managerial elements of traffic flow have been investigated, and they noticed that CO<sub>2</sub> emissions computed using different approaches varied. As a result, it is critical to concentrate on dependable estimating methodologies. Mikayilov et al. [56] investigated the link between economic growth and carbon emissions in Azerbaijan from 1992 to 2013. The findings reveal that economic growth and CO<sub>2</sub> emissions are positively connected in the long term. They suggest that carbon pricing tools and public awareness campaigns may be implemented to mitigate the adverse effects of pollution. Faridi and Mur-taza [57] demonstrated a relationship between disaggregated economic development, energy consumption, and agricultural value-added in Pakistan. The country's reliance on energy and gas means consumption increases faster than supply, which hurts output and exports. Secondary data from 1972 to 2011 was used in the study. According to the research, energy consumption and gas utilization are critical elements in increasing agricultural productivity and development. They also found that disaggregated energy use, economic growth, and agricultural production are linked to long-term growth.

Some of the recent publications on urban sanitation and carbon emissions are Li et al. [58], Chen et al. [59], Ortiz-Rodriguez et al. [60], Zhang et al. [61], and Collaço & da Curz [62]. Due to unsanitary circumstances, these studies mostly restricted the carbon footprint, worsening the natural environment. Zakari et al. [63] suggested that it is possible to acquire environmentally friendly technology to reduce harmful emissions. Nevertheless, the authorities should create and implement rules against power generation systems that are not eco-friendly and have the potential to harm the environment. Following the debate, the following hypothesis was developed: Khan et al. [64] concluded that the sustainability of the ecosystem declines when natural resources are used up. Clean energy contributes to an increase in environmental quality and a slowing of economic growth. Both energy security and ecological sustainability benefit from the transition to renewable energy. Khan et al. [65] further argued that governments should embrace sustainable tax changes to overcome worldwide environmental concerns and achieve a greener future. Government spending should be linked with environmental goals, pricing should reflect externalities, and fiscal reform should allow for green environment investment to achieve sustainable development goals. Zakari et al. [66] suggested that when there are specialized institutional procedures and energy sources, there is the possibility of improving the ecological footprint.

***H1: If there is not enough sanitation in cities, more natural distortions will happen, which will lead to more carbon emissions in a country.***

The stated hypothesis examines a country's existing urban sanitation position about the environmental sustainability agenda or the blue economy. Furthermore, the present literature favors adequate access to safe drinking water to promote healthy hygiene. It prefers to use eco-friendly items that increase environmental quality levels [67–71]. Based on the issue's significance, the study developed the second hypothesis,

***H2: Uncontaminated drinking water is likely to attain healthcare sustainability in a country.***



Finally, there is a plethora of work on the EKC hypothesis, energy-related emissions, and transportation emissions in various economic situations, for example, Erdogan et al. [72], Amin et al. [73], Shikwambana et al. [74], Murshed et al. [75], and Alola et al. [76]. According to these studies, the environmental sustainability agenda might be achieved by utilizing sustainable transportation, green energy consumption and production, and green development initiatives. The following is the hypothesis of the study, i.e.,

***H3: Continued economic expansion, nonrenewable fuels, and high traffic intensity are all expected to raise the cost of a country's carbon emissions.***

The real contribution of the research is to integrate several sustainable aspects into the resource conservation agenda, paving the way for global prosperity. First, the research investigates the effect of urban sanitation on the natural environment in densely populated places. The prior studies evaluated the indirect cost of sanitary infrastructure on environmental degradation while discounting the intensity of traffic loads, which is directly connected to the green development approach [77–79]. Second, the research included safe, non-polluted drinking water, which contributes to the improvement of public health and the promotion of a green and clean environment. Prior research supports the supplied assertion; however, just a few studies have examined the relationship between emissions and income [80–82]. The research used energy consumption as a reference for the emissions-income-sanitation nexus, which assists in evaluating urban infrastructure and energy sources to reduce carbon abatement costs. Prior studies focused on energy consumption and carbon emissions but little investigate other aspects that may have been significant; thus, these factors are crucial for investigation for long-term sustainable growth [83–85].

### 3. Data sources and methodological framework

The study analyzed data from 1975 to 2019 to examine CO2 emissions, urban sanitation, urban access to clean drinking water, energy consumption, traffic volume, and economic growth in Pakistan. The World Bank [86] provided the statistics for the criteria above. The variables are listed in Table 1.

The study started with the Solow growth model [87], which established the foundation for current economic theory. The Solow Growth model is an exogenous model that analyses variations in an economy's output levels over time due to population fluctuations. The production function determines the source of goods, which asserts that production is determined by the

**Table 1. List of variables.**

| Variables                           | Symbol | Measurement                     | Definition                                                                                                                                                                                                                          |
|-------------------------------------|--------|---------------------------------|-------------------------------------------------------------------------------------------------------------------------------------------------------------------------------------------------------------------------------------|
| Carbon dioxide emissions            | CO2    | kiloton                         | CO2 emissions are produced when fossil fuels are burned. Solid, liquid, and gaseous fuels are used to make it.                                                                                                                      |
| Urban sanitation                    | USAN   | % of urban population           | The proportion of city dwellers who use sanitation services and have them securely handled. Latrines and flushing to piped sewer systems are also incorporated.                                                                     |
| Urban access to safe drinking water | UASDW  | % of urban population           | The proportion of total urban residents who get their drinking water from a higher-quality source with a round-trip delivery time of less than half an hour. Better-quality sources include tube wells, hand pumps, and line pipes. |
| Gross domestic product              | INCOME | Current US\$                    | Throughout the fiscal year, the market value of currently generated products and services offered by all citizens of the country.                                                                                                   |
| Energy use                          | EUSE   | kg of oil equivalent per capita | It refers to the use of primary energy prior to its conversion to other end-use fuels.                                                                                                                                              |
| Traffic volume                      | TVOL   | TEU: 20-foot equivalent units   | The container port traffic statistics assess the volume of traffic intensity.                                                                                                                                                       |

<https://doi.org/10.1371/journal.pone.0271017.t001>

stock of capital and labor force, i.e.,

$$Y = F(K, L) \quad (1)$$

The Solow model employs the constant return to scale (CSR) hypothesis for the production function. This is a valid assumption. It makes the analysis easier. If the output function has a CSR, then

$$zY = F(zK, zL) \quad (2)$$

Assume  $z$  is a positive number. When ' $z$ ' is multiplied by both capital and labor, the quantity of output is also multiplied by  $z$ . We may investigate all quantities in the economy concerning the size of the labor force using production functions and CSR. The study, which was based on the Solow growth model, replaced economic growth of its byproduct, i.e., carbon emissions, which are generated during economic output, i.e.,

$$CO_2 = \beta_0 + \beta_1 USAN + \beta_2 UASDW + \beta_3 INCOME + \beta_4 (INCOME)^2 + \beta_5 EUSE + \beta_6 TVOL + \varepsilon \quad (3)$$

Fig 1 shows the trend analysis of the variables for ready reference. Carbon emissions persistently increases due to an increase in energy use, continued economic growth, traffic volume, and unhygienic basic sanitation services over a time period.

The ARDL bounds test, introduced by Pesaran et al. [88], was used in this study to determine the long-term relationship between the mentioned variables. ARDL provides several benefits over Johansen Cointegration and other approaches, as described by Pesaran et al. [89], i.e.,

- i. In an ARDL estimation, all variables in the same order may or may not be stationary.
- ii. The ARDL method yields reliable results in finite samples; and
- iii. The ARDL application delivers unbiased long-run model estimates by combining integrated variables in a single regression apparatus [90].

The following is the ARDL specification:

$$\begin{aligned} \Delta CO_2 = & \alpha_0 + \alpha_1 CO_{2,t-1} + \alpha_2 EUSE_{t-1} + \alpha_3 USAN_{t-1} + \alpha_4 UASDW_{t-1} + \alpha_5 TVOL_{t-1} + \alpha_6 INCOME_{t-1} + \\ & \alpha_7 INCOME^2_{t-1} + \sum_{i=0}^k \alpha_i \Delta CO_2 + \sum_{j=0}^m \alpha_j \Delta EUSE + \sum_{k=0}^o \alpha_k \Delta USAN + \sum_{l=0}^p \alpha_l \Delta UASDW + \\ & \sum_{m=0}^Q \alpha_m \Delta TVOL + \sum_{n=0}^R \alpha_n \Delta INCOME + \sum_{n=0}^R \alpha_n \Delta INCOME^2 + e_i \end{aligned} \quad (4)$$

Where;  $\Delta$  is the first difference of the variables.

The error correction term ( $p$ ) shows the adjustment of the stated variables towards the long-run equilibrium; hence it is included in Eq (4) for robust inferences, i.e.,

$$\begin{aligned} \Delta CO_2 = & \alpha_0 + \alpha_1 CO_{2,t-1} + \alpha_2 EUSE_{t-1} + \alpha_3 USAN_{t-1} + \alpha_4 UASDW_{t-1} + \alpha_5 TVOL_{t-1} + \alpha_6 INCOME_{t-1} + \\ & \alpha_7 INCOME^2_{t-1} + \sum_{i=0}^k \alpha_i \Delta CO_2 + \sum_{j=0}^m \alpha_j \Delta EUSE + \sum_{k=0}^o \alpha_k \Delta USAN + \sum_{l=0}^p \alpha_l \Delta UASDW + \\ & \sum_{m=0}^Q \alpha_m \Delta TVOL + \sum_{n=0}^R \alpha_n \Delta INCOME + \sum_{n=0}^R \alpha_n \Delta INCOME^2 + p + e_i \end{aligned} \quad (5)$$

The null hypothesis of no cointegration would be assessed through Wald F-statistics, i.e.,

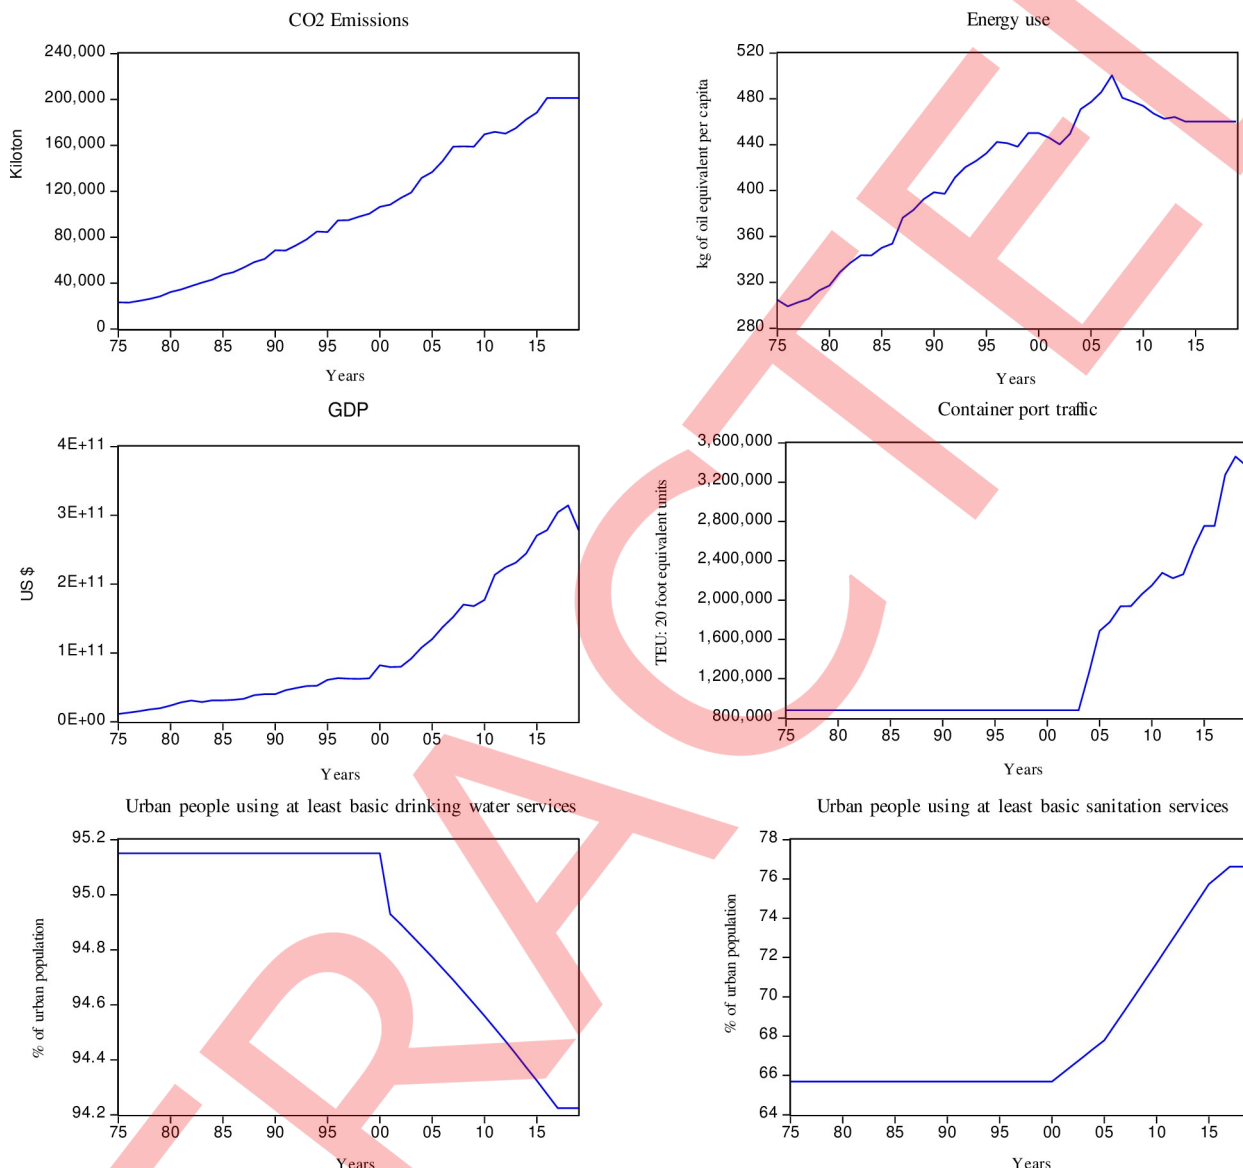

**Fig 1. Trend analysis of the studied variables.** Source: World Bank [86].

<https://doi.org/10.1371/journal.pone.0271017.g001>

$$H_0: \alpha_1 = \alpha_2 = \alpha_3 = \alpha_4 = \alpha_5 = \alpha_6 = \alpha_7 = 0$$

$$H_1: \alpha_1 \neq \alpha_2 \neq \alpha_3 \neq \alpha_4 \neq \alpha_5 \neq \alpha_6 \neq \alpha_7 \neq 0$$

The Narayan critical values of  $I(0)$  and  $I(1)$  bound values are assessed for the cointegration process.

#### 4. Results and discussion

The descriptive statistics for the variables are shown in Table 2. Carbon emissions have a low value of 331.783 and a high value of 987.832, with an average value of 700.061. The variable has a skewed distribution, with a standard deviation of 211.862. The average value of energy consumption, income, and traffic volume is around 413.699 kg of oil equivalent per capita, 815.350 US dollars, and 1404729 traffic intensity. The average value of urban sanitation and



Table 2. Descriptive statistics.

| Methods   | CO2     | EUSE    | INCOME   | TVOL     | UASDW  | USAN   |
|-----------|---------|---------|----------|----------|--------|--------|
| Mean      | 700.061 | 413.699 | 815.350  | 1404729  | 94.898 | 68.220 |
| Maximum   | 987.832 | 500.432 | 1197.913 | 3460700  | 95.149 | 76.619 |
| Minimum   | 331.783 | 299.104 | 477.967  | 878892   | 94.224 | 65.688 |
| Std. Dev. | 211.862 | 61.047  | 199.867  | 804428.4 | 0.334  | 3.861  |
| Skewness  | -0.241  | -0.623  | 0.070    | 1.230    | -0.876 | 1.218  |
| Kurtosis  | 1.728   | 1.974   | 2.600    | 3.203    | 2.221  | 2.892  |

<https://doi.org/10.1371/journal.pone.0271017.t002>

access to clean drinking water in cities is 68.220 percent and 94.898 percent of the total urban population. Traffic volume has a high peak of distribution, followed by urban sanitation, GDP, safe drinking water, energy use, and carbon emissions.

Table 3 illustrates that energy consumption, national income, traffic volume, and urban cleanliness all positively correlate with carbon emissions. In contrast, access to safe drinking water in cities is adversely associated with carbon emissions. Income, traffic volume, and urban cleanliness, on the other hand, raise a country's energy consumption, and the amount of traffic was shown to be positively connected with the country's income. The findings revealed that ongoing economic expansion, energy usage, traffic intensity, and insufficient sanitation facilities are natural environmental variables that worsen carbon emissions in a nation. To move forward with the green development strategy, the country should adopt strict economic measures.

Time-series data necessitates the investigation of data stationarity as a first step. As shown in Table 4, the analysis variables were not integrated into the same sequence. The findings indicate that CO2 emissions, uncontaminated clean drinking water, and urban sanitation are stationary variables. Energy consumption, income, and traffic volume, on the other hand, differ in a stationary manner. So, because of this, the ARDL Bounds testing method can be used to ensure that the results are reliable.

The ARDL Bounds testing estimates and Variance Inflation factor (VIF) for detecting multicollinearity are shown in Table 5. The reported Wald F-statistics value is 8.272, greater than the upper bound critical value of 1% significance. As a result, we could be sure that the cointegrated process matched up with the variables in the shown model. Further, the VIF value is less than the value of 10, hence, the study safely conclude the absence of multicollinearity in a given model.

The short-run ARDL estimations are shown in Table 6. The findings indicate that urban sanitation infrastructure is insufficient to reduce carbon emissions. It is critical to enhancing

Table 3. Correlation matrix.

| Variables           | CO2       | EUSE      | INCOME    | INCOME <sup>2</sup> | TVOL      | UASDW     | USAN |
|---------------------|-----------|-----------|-----------|---------------------|-----------|-----------|------|
| CO2                 | 1         |           |           |                     |           |           |      |
| EUSE                | 0.958***  | 1         |           |                     |           |           |      |
| INCOME              | 0.982***  | 0.905***  | 1         |                     |           |           |      |
| INCOME <sup>2</sup> | 0.958***  | 0.852***  | 0.992***  | 1                   |           |           |      |
| TVOL                | 0.779***  | 0.584***  | 0.855***  | 0.910***            | 1         |           |      |
| UASDW               | -0.833*** | -0.657*** | -0.884*** | -0.926***           | -0.969*** | 1         |      |
| USAN                | 0.772***  | 0.568***  | 0.846***  | 0.897***            | 0.982***  | -0.978*** | 1    |

Note

\*\*\* indicates 1% significance level.

<https://doi.org/10.1371/journal.pone.0271017.t003>

Table 4. ADF unit root estimates.

| Variables | Level     |           |        | First Difference |           |       | Order of Integration |
|-----------|-----------|-----------|--------|------------------|-----------|-------|----------------------|
|           | None      | Intercept | both   | None             | Intercept | Both  |                      |
| CO2       | 8.132     | -4.638*** | -----  | -----            | -----     | ----  | I(0)                 |
| EUSE      | 3.267     | -2.455    | 0.014  | -4.212***        | -----     | ----  | I(1)                 |
| INCOME    | 6.186     | -1.804    | -2.610 | -1.656*          | -5.500*** | ----- | I(1)                 |
| TVOL      | 1.528     | 0.261     | -1.575 | -3.692***        | -----     | ----- | I(1)                 |
| UASDW     | -3.710*** | -----     | -----  | -----            | -----     | ----- | I(0)                 |
| USAN      | 0.5937    | -3.822*** | -----  | -----            | -----     | ----- | I(0)                 |

Note

\*\*\* and \* indicates 1% and 10% level of significance.

<https://doi.org/10.1371/journal.pone.0271017.t004>

urban hygiene to avoid negative environmental externalities that impede the country's long-term efforts [91–93]. By achieving public health, access to clean and sterilized safe drinking water significantly reduces the cost of carbon emissions. Water treatment, the provision of clean and purified water, the chlorinated drinking water system, and ultrafiltration are just a few examples of sustainable water solutions that improve general public health and achieve healthcare sustainability [94–96]. As sustained economic expansion jeopardizes environmental damage in the form of growing carbon emissions, the country's GDP follows the monotonic increasing function of carbon emissions. If a country's carbon emissions are too high, it could use strict environmental policies [97], incentive-based regulations [98], and carbon pricing [99] in the long term.

Table 7 displays the ARDL long-run estimations, which verified the EKC hypothesis with a turning point of US\$ 729. Haans et al. [100] suggested a way to analyze EKC and get estimate its turning point, which followed in the given study and confirmed the inverted U-shaped relationship between the country's economic growth and carbon emissions. Energy consumption positively correlates with carbon emissions, which validates energy-embodied products. Carbon excretions are positively and negatively associated with urban sanitation systems and clean drinking water, and the latter validated the higher carbon emissions caused by insufficient urban sanitation services. On the other hand, the former underlined the importance of clean drinking water in improving public health hygiene elements and accomplishing the healthcare sustainability target. Several previous investigations, including Sarkodie and Ozturk [101], Murshed et al. [102], Erdogan et al. [103], and Suki et al. [104], corroborated the EKC theory by energy embodied emissions. These investigations confirmed that energy fuels hinder the green development strategy. Alternative power energies should be used to meet energy efficiency and other goals [105–107].

Furthermore, urban sanitation increases carbon emissions, yet urban access to clean drinking water improves health hygienic aspects, resulting in healthcare sustainability. Previous

Table 5. ARDL bounds test estimates.

| Test Statistics    | Value | Degree of freedom | Variables                    | VIF   |
|--------------------|-------|-------------------|------------------------------|-------|
| F-statistics       | 8.272 | 6                 | Constant                     | NA    |
| Significance Level | I(0)  | I(1)              | $\Delta \ln(\text{EU})$      | 1.370 |
| 10%                | 1.75  | 2.87              | $\Delta \ln(\text{GDP})$     | 1.102 |
| 5%                 | 2.04  | 3.24              | $\Delta \ln(\text{TRAFFIC})$ | 1.391 |
| 2.5%               | 2.32  | 3.59              | $\Delta \ln(\text{UASDW})$   | 1.725 |
| 1%                 | 2.66  | 4.05              | $\Delta \ln(\text{USAN})$    | 2.074 |

<https://doi.org/10.1371/journal.pone.0271017.t005>

Table 6. ARDL short-run estimates.

| Variables              | Coefficients | S. Error | t-statistics | Probability |
|------------------------|--------------|----------|--------------|-------------|
| D(USAN)                | 10.007       | 3.241    | 3.087        | 0.003       |
| D(UASDW)               | -11.775      | 2.438    | -4.828       | 0.000       |
| D(TVOL)                | 0.000012     | 0.00002  | 0.596        | 0.554       |
| D(EUSE)                | 1.845        | 0.273    | 6.738        | 0.000       |
| D(INCOME)              | 0.505        | 0.258    | 1.954        | 0.058       |
| D(INCOME) <sup>2</sup> | -0.00019     | 0.00015  | -1.206       | 0.235       |
| CointEq(-1)            | -0.889       | 0.097    | -9.141       | 0.000       |

Note: Dependent variable: D (CO<sub>2</sub>). CointEq(-1) shows error correction term.

<https://doi.org/10.1371/journal.pone.0271017.t006>

research corroborated the study's findings by identifying many sustainable elements that contribute to good sanitation services and the supply of clean drinking water. For example, Dickin et al. [78] underlined the need to improve sanitation services through climate finance sources that aid in achieving long-term cleanliness. Anser et al. [108] stated that urbanization and sustained economic expansion are the primary causes of rising carbon emissions, and both must be addressed through urban planning and incentive-based legislation. Li et al. [58] said that decentralizing water treatment through new technology that makes drinking water safe and clean was important. The diagnostic test estimates confirmed the absence of normality issue, serial correlation, heteroskedasticity, and measurement issue in the given model.

The CUSUM test verifies the model's parameter stability. To understand the findings, the order of sums and squares of recursive residuals is determined from subsamples of the data. The null hypothesis of parameter constancy states that the model is unstable or that structure change occurs over time based on the sequence values outside of the model. The alternative hypothesis confirms that the model is stable and the values remain within the residual series. Fig 2 depicts the CUSUM and CUSUM square statistics, revealing that the model is stable over time and statistically significant at a 5% significance level.

## 5. Conclusions and policy recommendations

The study's purpose is to assess the three primary United Nations objectives, including SDG-6, SDG-7, and SDG-13, in the context of Pakistan. Pakistan's economy was confronted with

Table 7. ARDL long-run estimates.

| Variables                                                           | Coefficients  | S. Error                | t-Stat.   | Probability   |
|---------------------------------------------------------------------|---------------|-------------------------|-----------|---------------|
| INCOME                                                              | 0.001458      | 0.000626                | 2.330607  | 0.0253        |
| INCOME <sup>2</sup>                                                 | -0.000001     | 0.0000004794            | -2.085844 | 0.0439        |
| <b>EKC Turning Point = -(INCOME/2×INCOME<sup>2</sup>) = US\$729</b> |               |                         |           |               |
| EUSE                                                                | 2.384174      | 0.476289                | 5.005727  | 0.0000        |
| TVOL                                                                | -0.152837     | 0.106540                | -1.434559 | 0.1598        |
| UASDW                                                               | -4.199069     | 1.187151                | -3.537097 | 0.0011        |
| USAN                                                                | 3.944168      | 1.097968                | 3.592245  | 0.0009        |
| <b>Diagnostic Testing</b>                                           |               |                         |           |               |
| J.B Test                                                            | 1.104 (0.575) | Heteroskedasticity Test |           | 1.051 (0.418) |
| Autocorrelation LM Test                                             | 1.223 (0.307) |                         |           |               |
| Ramsey RESET Test                                                   | 1.653 (0.106) |                         |           |               |

Note: small bracket shows probability value.

<https://doi.org/10.1371/journal.pone.0271017.t007>

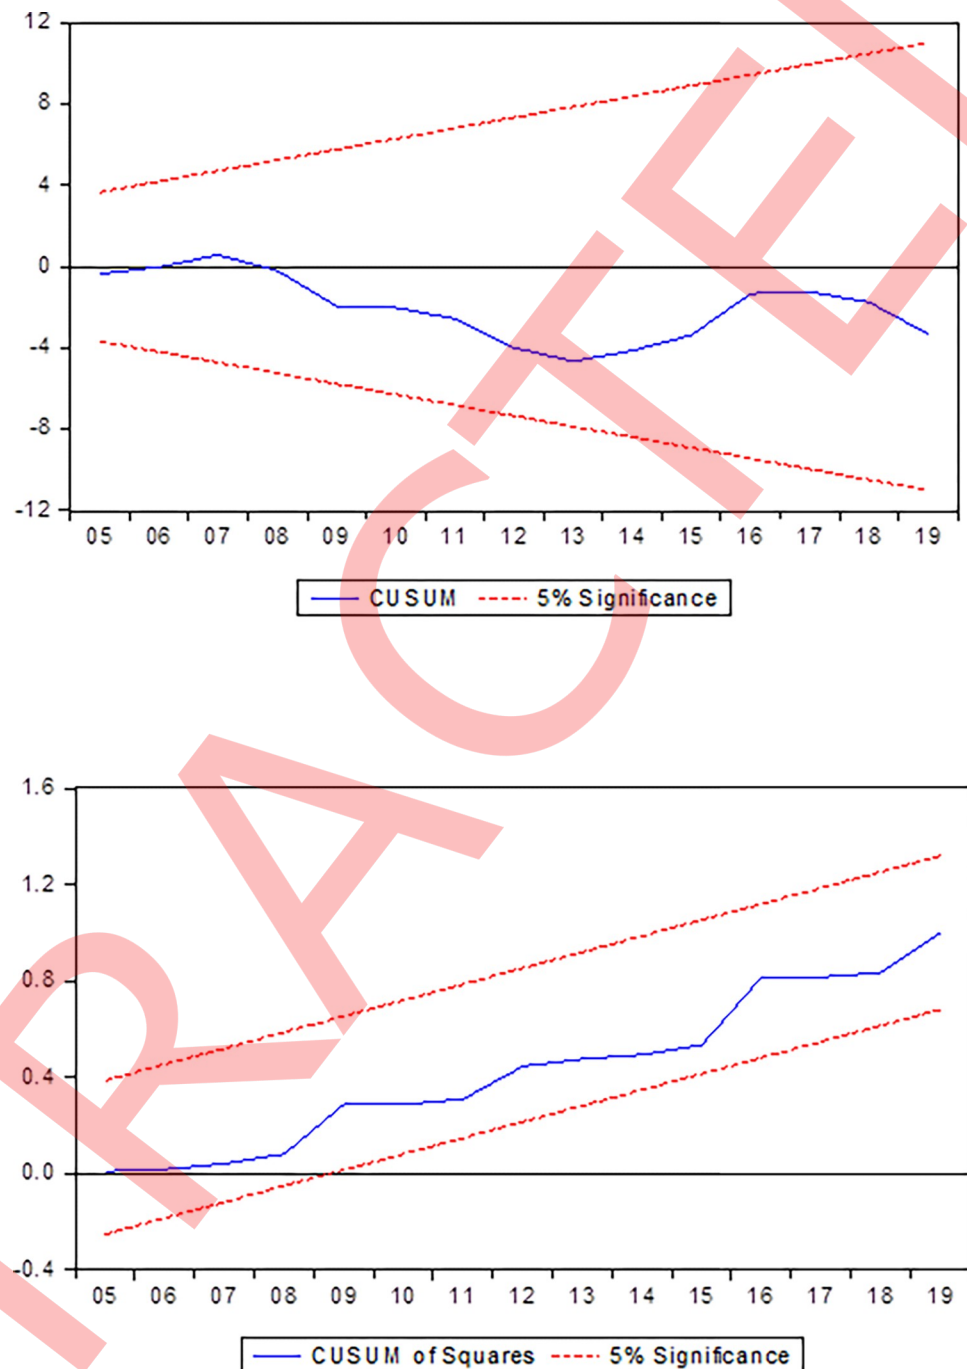

**Fig 2. CUSUM and CUSUM square estimates.** Source: Author's estimates.

<https://doi.org/10.1371/journal.pone.0271017.g002>

health-related challenges, including polluted drinking water and increased carbon emissions. The study assessed the parameters mentioned above by gathering data from 1975 to 2019 using the ARDL Bounds testing technique. The results validate the EKC hypothesis in the long run, but the connection between the two elements becomes a monotonic growing function in the short run. The urban sanitation system is ineffective in mitigating the adverse effects of environmental externalities while exacerbating carbon emissions. Fresh and safe water intake

enhances ordinary people's health hygiene and proclivity to buy eco-friendly items to minimize carbon emissions. Because of the substantial usage of energy fuels in the whole energy mix, energy demand raises carbon emissions. The study provided the following strategic plans based on the stated results:

- i. The issue of sanitation highlights the need for a broader perspective on adaptation, one that considers the challenge of providing equal access to essential services for the world's poorest populations while also adjusting to the dangers posed by climate change. To improve climate finance for sanitation projects, investors need to know better about this relationship, especially about initiatives that promote equitable access via flexible and low-emission technologies.
- ii. Access to safe and uncontaminated drinking water is another critical component of the healthcare sustainability agenda. Water-borne infections are disseminated mainly by contaminated and filthy drinking water, posing serious health risks. Public labs should clean the water and put up public water filters so people can get clean and clear drinking water quickly.
- iii. The travel and transportation systems should be electrified and run on renewable energy fuels to prevent carbon emissions. The level of traffic should be managed, and sustainable ways of public transit should be used. The government should charge very little for public transportation, which helps cut down on carbon emissions by cutting down on traffic.
- iv. The greater reliance on fossil fuel combustion for economic enterprises must be replaced by renewable fuels, resulting in carbon neutrality. Exploring the plentiful renewable energy resources for energy production is critical for policymakers to uncover the stock of biomass energy and biogas, which are less sensitive to the environment, and
- v. Continued economic expansion necessitates greater emissions to complete the life cycle of their manufacturing process. As a result, the cost of carbon emissions has risen, having a significant impact on green and clean development goals. The few critical policy components supporting economic growth while reducing carbon emissions are incentive-based environmental legislation, strong command-and-control mechanisms, carbon pricing, green energy utilization, and technical innovation.

The five-point plan would help us be more energy-efficient and solve long-term water and sanitation problems so that we can move forward toward a healthier future.

## Author Contributions

**Conceptualization:** Luqman Khalil, Shujaat Abbas, Kamil Hussain, Khalid Zaman, Muhammad Khalid Anser.

**Data curation:** Luqman Khalil.

**Formal analysis:** Luqman Khalil, Khalid Zaman.

**Funding acquisition:** Shujaat Abbas, Iswan, Hailan Salamun, Zainudin Bin Hassan, Muhammad Khalid Anser.

**Investigation:** Luqman Khalil, Shujaat Abbas, Kamil Hussain, Khalid Zaman.

**Methodology:** Luqman Khalil, Khalid Zaman.

**Project administration:** Shujaat Abbas, Kamil Hussain, Iswan, Hailan Salamun, Zainudin Bin Hassan, Muhammad Khalid Anser.



**Resources:** Shujaat Abbas, Kamil Hussain, Iswan, Hailan Salamun, Zainudin Bin Hassan, Muhammad Khalid Anser.

**Supervision:** Khalid Zaman.

**Validation:** Shujaat Abbas, Kamil Hussain, Iswan, Hailan Salamun, Zainudin Bin Hassan, Muhammad Khalid Anser.

**Writing – original draft:** Luqman Khalil, Khalid Zaman.

**Writing – review & editing:** Shujaat Abbas, Kamil Hussain, Iswan, Hailan Salamun, Zainudin Bin Hassan, Muhammad Khalid Anser.

## References

1. Foster T, Falletta J, Amin N, Rahman M, Liu P, Raj S, et al. Modelling faecal pathogen flows and health risks in urban Bangladesh: implications for sanitation decision making. *International Journal of Hygiene and Environmental Health*. 2021 Apr 1; 233:113669. <https://doi.org/10.1016/j.ijheh.2020.113669> PMID: 33578186
2. Starovoytova D. Solid Waste Management (SWM) at a University Campus (Part 1/10): Comprehensive-review on legal framework and background to waste management, at a global context. *Journal of Environment and Earth Science*. 2018; 8(4):2225–0948.
3. Sinharoy SS, Pittluck R, Clasen T. Review of drivers and barriers of water and sanitation policies for urban informal settlements in low-income and middle-income countries. *Utilities policy*. 2019 Oct 1; 60:100957. <https://doi.org/10.1016/j.jup.2019.100957> PMID: 32214692
4. United Nations. General Assembly declares access to clean water and sanitation is a human right, 2010. Online available at: <https://news.un.org/en/story/2010/07/346122-general-assembly-declares-access-clean-water-and-sanitation-human-right> (accessed on 11th August 2021).
5. Odagiri M, Thomas A, Listyasaki M, Mills F, Bain RE, Muhammad Z, et al. Safely managed on-site sanitation: A national assessment of sanitation services and potential fecal exposure in Indonesia. *International journal of environmental research and public health*. 2021 Aug 3; 18(15):8204. <https://doi.org/10.3390/ijerph18158204> PMID: 34360496
6. WHO. Sanitation. World Health organization, 2019. Online available at: <https://www.who.int/news-room/fact-sheets/detail/sanitation> (accessed on 11th August 2021).
7. World Bank. When Water Becomes a Hazard: A Diagnostic Report on The State of Water Supply, Sanitation and Poverty in Pakistan and Its Impact on Child Stunting. The World Bank 2018. Online available at: <https://openknowledge.worldbank.org/handle/10986/30799> (accessed on 11th August 2021).
8. Cooper R., *Water sanitation and hygiene services in Pakistan, 2018*. K4D Helpdesk Report. Brighton, UK: Institute of Development Studies. Online available at: <https://gsdrc.org/publications/water-sanitation-and-hygiene-services-in-pakistan/> (accessed on 11th August 2021).
9. Government of KP. Khyber Pakhtunkhwa Health Survey 2017. Planning and development department, Peshawar, Pakistan. Online available at: [http://kphis.kphealth.pk/KPHS2017\\_30\\_Oct\\_2017.pdf](http://kphis.kphealth.pk/KPHS2017_30_Oct_2017.pdf) (accessed on 11th August 2021).
10. Government of the Punjab. Punjab sector development plan 2014–2024: Drinking Water, Sanitation and Hygiene, 2015. Planning and Development Department, Lahore, Pakistan. Online available at: <https://pnd.punjab.gov.pk/system/files/Punjab%20WASH%20Sector%20Development%20Plan%202014-24.pdf> (accessed on 11th August 2021).
11. Agha MK. Punjab Government's Perspective: Sanitation as Cross Cutting (Health and Nutrition). Presentation at 7th South Asian Conference on Sanitation, April 2018. Online available at: <https://drive.google.com/drive/folders/1qXQg45jFs5l0ZQ175nngx-9cB64pB2jY> (accessed on 11th August 2021).
12. Bibri SE. Data-driven smart sustainable cities of the future: Urban computing and intelligence for strategic, short-term, and joined-up planning. *Computational Urban Science*. 2021 Dec; 1(1):1–29.
13. Kuru K. Planning the future of smart cities with swarms of fully autonomous unmanned aerial vehicles using a novel framework. *IEEE Access*. 2021 Jan 5; 9:6571–95.
14. Mondejar ME, Avtar R, Diaz HL, Dubey RK, Esteban J, Gómez-Morales A, et al. Digitalization to achieve sustainable development goals: Steps towards a Smart Green Planet. *Science of the Total Environment*. 2021 Nov 10; 794:148539. <https://doi.org/10.1016/j.scitotenv.2021.148539> PMID: 34323742

15. Strielkowski W, Veinbender T, Tvaronavičienė M, Lacey N. Economic efficiency and energy security of smart cities. *Economic research-Ekonomska istraživanja*. 2020 Jan 1; 33(1):788–803.
16. Samarakoon S. The troubled path to ending darkness: Energy injustice encounters in Malawi's off-grid solar market. *Energy Research & Social Science*. 2020 Nov 1; 69:101712.
17. Wei Z, Han B, Pan X, Shahbaz M, Zafar MW. Effects of diversified openness channels on the total-factor energy efficiency in China's manufacturing sub-sectors: Evidence from trade and FDI spillovers. *Energy Economics*. 2020 Aug 1; 90:104836.
18. Gál Z. From Economic Transformation to Energy Transition: The Legacy of Thirty Years of Post-Communist Development, 2021. In: Mišík M., Oravcová V. (eds) *From Economic to Energy Transition. Energy, Climate and the Environment*. Palgrave Macmillan, Cham. [https://doi.org/10.1007/978-3-030-55085-1\\_2](https://doi.org/10.1007/978-3-030-55085-1_2)
19. Lawal AI, Ozturk I, Olanipekun IO, Asaleye AJ. Examining the linkages between electricity consumption and economic growth in African economies. *Energy*. 2020 Oct 1; 208:118363.
20. Ozturk I. The dynamic relationship between agricultural sustainability and food-energy-water poverty in a panel of selected Sub-Saharan African Countries. *Energy Policy*. 2017 Aug 1; 107:289–99.
21. Solarin SA, Al-Mulali U, Musah I, Ozturk I. Investigating the pollution haven hypothesis in Ghana: an empirical investigation. *Energy*. 2017 Apr 1; 124:706–19.
22. Murphy MK. Scientific argument without a scientific consensus: Rachel Carson's rhetorical strategies in the Silent Spring debates. *Argumentation and Advocacy*. 2019 Jul 3; 55(3):194–210.
23. Zhang C, Khan I, Dagar V, Saeed A, Zafar MW. Environmental impact of information and communication technology: Unveiling the role of education in developing countries. *Technological Forecasting and Social Change*. 2022 May 1; 178:121570.
24. Arslan HM, Khan I, Latif MI, Komal B, Chen S. Understanding the dynamics of natural resources rents, environmental sustainability, and sustainable economic growth: new insights from China. *Environmental Science and Pollution Research*. 2022 Apr 4:1–6, <https://doi.org/10.1007/s11356-022-19952-y>.
25. Khan I, Zakari A, Dagar V, Singh S. World energy trilemma and transformative energy developments as determinants of economic growth amid environmental sustainability. *Energy Economics*. 2022 Apr 1; 108:105884.
26. Taghizadeh-Hesary F, Zakari A, Yoshino N, Khan I. Leveraging on energy security to alleviate poverty in Asian economies. *The Singapore Economic Review*. 2022 Jan 29:1–28, <https://doi.org/10.1142/S0217590822440015>.
27. Hassan ST, Batool B, Zhu B, Khan I. Environmental complexity of globalization, education, and income inequalities: New insights of energy poverty. *Journal of Cleaner Production*. 2022 Mar 15; 340:130735.
28. Rauf A, Liu X, Amin W, Ozturk I, Rehman OU, Hafeez M. Testing EKC hypothesis with energy and sustainable development challenges: a fresh evidence from belt and road initiative economies. *Environmental Science and Pollution Research*. 2018 Nov; 25(32):32066–80. <https://doi.org/10.1007/s11356-018-3052-5> PMID: 30218332
29. Le HP, Ozturk I. The impacts of globalization, financial development, government expenditures, and institutional quality on CO2 emissions in the presence of environmental Kuznets curve. *Environmental Science and Pollution Research*. 2020 Jun; 27(18):22680–97. <https://doi.org/10.1007/s11356-020-08812-2> PMID: 32323231
30. Koondhar MA, Shahbaz M, Ozturk I, Randhawa AA, Kong R. Revisiting the relationship between carbon emission, renewable energy consumption, forestry, and agricultural financial development for China. *Environmental Science and Pollution Research*. 2021 Sep; 28(33):45459–73. <https://doi.org/10.1007/s11356-021-13606-1> PMID: 33866506
31. World Bank. World Development Report 1992: Development and the Environment. Online available at: <https://elibrary.worldbank.org/doi/abs/10.1596/0-1952-0876-5> (accessed on 11th August 2021).
32. Badeeb RA, Lean HH, Shahbaz M. Are too many natural resources to blame for the shape of the Environmental Kuznets Curve in resource-based economies?. *Resources Policy*. 2020 Oct 1; 68:101694.
33. Ahmed K, Apergis N, Bhattacharya M, Paramati SR. Electricity consumption in Australia: the role of clean energy in reducing CO2 emissions. *Applied Economics*. 2021 Oct 14; 53(48):5535–48.
34. Usman M, Makhadmeh MS, Kousar R. Does financial inclusion, renewable and non-renewable energy utilization accelerate ecological footprints and economic growth? Fresh evidence from 15 highest emitting countries. *Sustainable Cities and Society*. 2021 Feb 1; 65:102590.
35. Destek MA, Sinha A. Renewable, non-renewable energy consumption, economic growth, trade openness and ecological footprint: evidence from organisation for economic Co-operation and development countries. *Journal of Cleaner Production*. 2020 Jan 1; 242:118537.

36. Ahmed Z, Nathaniel SP, Shahbaz M. The criticality of information and communication technology and human capital in environmental sustainability: evidence from Latin American and Caribbean countries. *Journal of Cleaner Production*. 2021 Mar 1; 286:125529.
37. Piłatowska M, Geise A, Włodarczyk A. The effect of renewable and nuclear energy consumption on decoupling economic growth from CO<sub>2</sub> emissions in Spain. *Energies*. 2020 Apr 25; 13(9):2124.
38. Rasli AM, Qureshi MI, Isah-Chikaji A, Zaman K, Ahmad M. New toxics, race to the bottom and revised environmental Kuznets curve: The case of local and global pollutants. *Renewable and Sustainable Energy Reviews*. 2018 Jan 1; 81:3120–30.
39. Bashir MF, Benjiang MA, Shahbaz M, Shahzad U, Vo XV. Unveiling the heterogeneous impacts of environmental taxes on energy consumption and energy intensity: empirical evidence from OECD countries. *Energy*. 2021 Jul 1; 226:120366.
40. Bayar Y, Gavriltea MD, Sauer S, Paun D. Impact of municipal waste recycling and renewable energy consumption on CO<sub>2</sub> emissions across the European Union (EU) member countries. *Sustainability*. 2021 Jan 12; 13(2):656.
41. Janes-Bassett V, Bassett R, Rowe EC, Tipping E, Yumashev D, Davies J. Changes in carbon storage since the pre-industrial era: A national scale analysis. *Anthropocene*. 2021 Jun 1; 34:100289.
42. Rowlinson MJ, Rap A, Hamilton DS, Pope RJ, Hantson S, Arnold SR, et al. Tropospheric ozone radiative forcing uncertainty due to pre-industrial fire and biogenic emissions. *Atmospheric Chemistry and Physics*. 2020 Sep 22; 20(18):10937–51.
43. Willcock S, Parker A, Wilson C, Brewer T, Bundhoo D, Cooper S, et al. Nature provides valuable sanitation services. *One Earth*. 2021 Feb 19; 4(2):192–201.
44. Ali R, Bakhsh K, Yasin MA. Impact of urbanization on CO<sub>2</sub> emissions in emerging economy: evidence from Pakistan. *Sustainable Cities and Society*. 2019 Jul 1; 48:101553.
45. Liu X, Bae J. Urbanization and industrialization impact of CO<sub>2</sub> emissions in China. *Journal of cleaner production*. 2018 Jan 20; 172:178–86.
46. Bekhet HA, Othman NS. Impact of urbanization growth on Malaysia CO<sub>2</sub> emissions: Evidence from the dynamic relationship. *Journal of cleaner production*. 2017 Jun 15; 154:374–88.
47. Dogan E, Turkekul B. CO<sub>2</sub> emissions, real output, energy consumption, trade, urbanization and financial development: testing the EKC hypothesis for the USA. *Environmental Science and Pollution Research*. 2016 Jan; 23(2):1203–13. <https://doi.org/10.1007/s11356-015-5323-8> PMID: 26351068
48. Tyagi S, Garg N, Paudel R. Environmental degradation: Causes and consequences. *European researcher*. 2014; 81(8–2):1491.
49. Al-Mulali U, Fereidouni HG, Lee JY, Sab CN. Exploring the relationship between urbanization, energy consumption, and CO<sub>2</sub> emission in MENA countries. *Renewable and Sustainable Energy Reviews*. 2013 Jul 1; 23:107–12.
50. Kraft J, Kraft A. On the relationship between energy and GNP. *The Journal of Energy and Development*. 1978 Apr 1:401–3.
51. Soytas U, Sari R. Energy consumption and GDP: causality relationship in G-7 countries and emerging markets. *Energy economics*. 2003 Jan 1; 25(1):33–7.
52. Streimikiene D, Kasperowicz R. Review of economic growth and energy consumption: A panel cointegration analysis for EU countries. *Renewable and Sustainable Energy Reviews*. 2016 Jun 1; 59:1545–9.
53. Gorus MS, Aydin M. The relationship between energy consumption, economic growth, and CO<sub>2</sub> emission in MENA countries: causality analysis in the frequency domain. *Energy*. 2019 Feb 1; 168:815–22.
54. Xie Q, Xu X, Liu X. Is there an EKC between economic growth and smog pollution in China? New evidence from semiparametric spatial autoregressive models. *Journal of Cleaner Production*. 2019 May 20; 220:873–83.
55. Zhang L, Long R, Chen H, Geng J. A review of China's road traffic carbon emissions. *Journal of Cleaner Production*. 2019 Jan 10; 207:569–81.
56. Mikayilov JI, Galeotti M, Hasanov FJ. The impact of economic growth on CO<sub>2</sub> emissions in Azerbaijan. *Journal of cleaner production*. 2018 Oct 1; 197:1558–72.
57. Faridi MZ, Murtaza G. Disaggregate energy consumption, agricultural output and economic growth in Pakistan. *The Pakistan Development Review*. 2013 Dec 1:493–514.
58. Li Y, Khalkhali M, Mo W, Lu Z. Modeling spatial diffusion of decentralized water technologies and impacts on the urban water systems. *Journal of Cleaner Production*. 2021 Sep 15; 315:128169.
59. Chen S, Fang K, Dhakal S, Kharrazi A, Tong K, Ramaswami A. Reshaping urban infrastructure for a carbon-neutral and sustainable future. *Resources, Conservation and Recycling*. 2021; 174:e105765.

60. Ortiz-Rodriguez OO, Sonnemann G, Villamizar-G RA. The carbon footprint of water treatment as well as sewer and sanitation utilities of Pamplona in Colombia. *Environment, Development and Sustainability*. 2022 Mar; 24(3):3982–99.
61. Zhang Y, Ge T, Liu J, Sun Y, Liu Y, Zhao Q, et al. The comprehensive measurement method of energy conservation and emission reduction in the whole process of urban sewage treatment based on carbon emission. *Environmental Science and Pollution Research*. 2021 Oct; 28(40):56727–40. <https://doi.org/10.1007/s11356-021-14472-7> PMID: 34060018
62. Collaço FM, da Cruz RBC. The Integration of Energy Planning and Urban Planning: A Synergies Analysis of the Achievement of the Sustainable Development Goals. In: Leal Filho W., Azeiteiro U.M., Setti A.F.F. (eds) *Sustainability in Natural Resources Management and Land Planning*. World Sustainability Series. Springer, Cham, 2021. [https://doi.org/10.1007/978-3-030-76624-5\\_7](https://doi.org/10.1007/978-3-030-76624-5_7)
63. Zakari A, Li G, Khan I, Jindal A, Tawiah V, Alvarado R. Are abundant energy resources and Chinese business a solution to environmental prosperity in Africa?. *Energy Policy*. 2022 Apr 1; 163:112829.
64. Khan I, Zakari A, Zhang J, Dagar V, Singh S. A study of trilemma energy balance, clean energy transitions, and economic expansion in the midst of environmental sustainability: New insights from three trilemma leadership. *Energy*. 2022 Jun 1; 248:123619.
65. Khan I, Tan D, Hassan ST. Role of alternative and nuclear energy in stimulating environmental sustainability: impact of government expenditures. *Environmental Science and Pollution Research*. 2022 May; 29(25):37894–905. <https://doi.org/10.1007/s11356-021-18306-4> PMID: 35067874
66. Zakari A, Khan I, Tawiah V, Alvarado R. Reviewing the ecological footprints of Africa top carbon consumer: a quantile on quantile analysis. *International Journal of Environmental Science and Technology*. 2022 Jan 12:1–2, <https://doi.org/10.1007/s13762-021-03904-z>.
67. Milner J, Hamilton I, Woodcock J, Williams M, Davies M, Wilkinson P, et al. Health benefits of policies to reduce carbon emissions. *Bmj*. 2020 Mar 30; 368. <https://doi.org/10.1136/bmj.l6758> PMID: 32229476
68. Katekar VP, Deshmukh SS. Energy-Drinking Water-Health Nexus in Developing Countries. In: Asif M. (eds) *Energy and Environmental Security in Developing Countries*. Advanced Sciences and Technologies for Security Applications. Springer, Cham 2021. [https://doi.org/10.1007/978-3-030-63654-8\\_17](https://doi.org/10.1007/978-3-030-63654-8_17)
69. Ray I, Smith KR. Towards safe drinking water and clean cooking for all. *The Lancet Global Health*. 2021 Mar 1; 9(3):e361–5. [https://doi.org/10.1016/S2214-109X\(20\)30476-9](https://doi.org/10.1016/S2214-109X(20)30476-9) PMID: 33444550
70. Narayan AS, Marks SJ, Meierhofer R, Strande L, Tilley E, Zurbrugg C, et al. Advancements in and Integration of Water, Sanitation, and Solid Waste for Low-and Middle-Income Countries. *Annual Review of Environment and Resources*. 2021 Jun 3; 46:193–219.
71. Lütke DU, Luetkemeier R, Schneemann M, Liehr S. Increase in daily household water demand during the first wave of the COVID-19 pandemic in Germany. *Water*. 2021 Jan 21; 13(3):260.
72. Erdogan S, Adedoyin FF, Bekun FV, Sarkodie SA. Testing the transport-induced environmental Kuznets curve hypothesis: The role of air and railway transport. *Journal of Air Transport Management*. 2020 Oct 1; 89:101935.
73. Amin A, Altinoz B, Dogan E. Analyzing the determinants of carbon emissions from transportation in European countries: the role of renewable energy and urbanization. *Clean Technologies and Environmental Policy*. 2020 Oct; 22(8):1725–34.
74. Shikwambana L, Mhangara P, Kganyago M. Assessing the relationship between economic growth and emissions levels in South Africa between 1994 and 2019. *Sustainability*. 2021 Mar 2; 13(5):2645.
75. Murshed M, Nurmakhanova M, Elhaddad M, Ahmed R. Value addition in the services sector and its heterogeneous impacts on CO2 emissions: revisiting the EKC hypothesis for the OPEC using panel spatial estimation techniques. *Environmental Science and Pollution Research*. 2020 Nov; 27(31):38951–73. <https://doi.org/10.1007/s11356-020-09593-4> PMID: 32638298
76. Alola AA, Lasisi TT, Eluwole KK, Alola UV. Pollutant emission effect of tourism, real income, energy utilization, and urbanization in OECD countries: a panel quantile approach. *Environmental Science and Pollution Research*. 2021 Jan; 28(2):1752–61. <https://doi.org/10.1007/s11356-020-10556-y> PMID: 32852717
77. Howden-Chapman P, Keall M, Whitwell K, Chapman R. Evaluating natural experiments to measure the co-benefits of urban policy interventions to reduce carbon emissions in New Zealand. *Science of the Total Environment*. 2020 Jan 15; 700:134408. <https://doi.org/10.1016/j.scitotenv.2019.134408> PMID: 31627043
78. Dickin S, Bayoumi M, Giné R, Andersson K, Jiménez A. Sustainable sanitation and gaps in global climate policy and financing. *NPJ Clean Water*. 2020 May 25; 3(1):1–7.
79. Wang C, Zhan J, Xin Z. Comparative analysis of urban ecological management models incorporating low-carbon transformation. *Technological Forecasting and Social Change*. 2020 Oct 1; 159:120190.



80. Liu F, Tait S, Schellart A, Mayfield M, Boxall J. Reducing carbon emissions by integrating urban water systems and renewable energy sources at a community scale. *Renewable and Sustainable Energy Reviews*. 2020 May 1; 123:109767.
81. Mehrjerdi H, Aljabery AA. Modeling and optimal planning of an energy–water–carbon nexus system for sustainable development of local communities. *Advanced Sustainable Systems*. 2021 Jul; 5(7):2100024.
82. Ferdous R., Ahmed MT. Is Environmental Kuznets Hypothesis Vice-Versa for Bangladesh Especially in the Times of Global Climate Change?—An ARDL Econometric Modeling Approach. *Energy Economics Letters*. 2022; 9(1), 55–66. <https://doi.org/10.55493/5049.v9i1.4571>
83. Sharifi E, Larbi M, Omran H, Boland J. Climate change adaptation and carbon emissions in green urban spaces: Case study of Adelaide. *Journal of Cleaner Production*. 2020 May 1; 254:120035.
84. Tehreem HS, Anser MK, Nassani AA, Abro MM, Zaman K. Impact of average temperature, energy demand, sectoral value added, and population growth on water resource quality and mortality rate: it is time to stop waiting around. *Environmental Science and Pollution Research*. 2020 Oct; 27(30):37626–44. <https://doi.org/10.1007/s11356-020-09822-w> PMID: 32607999
85. Saleem H, Khan MB, Shabbir MS. The role of financial development, energy demand, and technological change in environmental sustainability agenda: evidence from selected Asian countries. *Environmental Science and Pollution Research*. 2020 Feb; 27(5):5266–80. <https://doi.org/10.1007/s11356-019-07039-0> PMID: 31845283
86. World Bank. World development indicators 2021, World Bank, Washington D.C.
87. Solow RM. A contribution to the theory of economic growth. *The quarterly journal of economics*. 1956 Feb 1; 70(1):65–94.
88. Pesaran MH, Shin Y, Smith RJ. Bounds testing approaches to the analysis of level relationships. *Journal of applied econometrics*. 2001 May; 16(3):289–326.
89. Pesaran MH, Shin Y, Smith RP. Pooled mean group estimation of dynamic heterogeneous panels. *Journal of the American statistical Association*. 1999 Jun 1; 94(446):621–34.
90. Harris R, Sollis R. *Applied time series modelling and forecasting* 2003. Wiley. Online available at: <https://eprints.gla.ac.uk/33105/> (accessed on 11<sup>th</sup> August 2021).
91. Cristiano S, Ghisellini P, D'Ambrosio G, Xue J, Nesticò A, Gonella F, et al. Construction and demolition waste in the Metropolitan City of Naples, Italy: State of the art, circular design, and sustainable planning opportunities. *Journal of Cleaner Production*. 2021 Apr 15; 293:125856.
92. Jiang Y, Zhang H, He J, Zeng Y. Carbon Emission of Municipal Solid Waste in Shanghai. In IOP Conference Series: Earth and Environmental Science 2020 Aug 1 (Vol. 555, No. 1, p. 012058). IOP Publishing.
93. Moghadam MA, Feizi R, Panahi Fard M, Haghighi Fard NJ, Omidinasab M, Faraji M, et al. Estimating greenhouse emissions from sanitary landfills using Land-GEM and IPCC model based on realistic scenarios of different urban areas: a case study of Iran. *Journal of Environmental Health Science and Engineering*. 2021 Jun; 19(1):819–30. <https://doi.org/10.1007/s40201-021-00649-2> PMID: 34150275
94. Hafeez A, Shamair Z, Shezad N, Javed F, Fazal T, ur Rehman S, et al. Solar powered decentralized water systems: a cleaner solution of the industrial wastewater treatment and clean drinking water supply challenges. *Journal of Cleaner Production*. 2021 Mar 20; 289:125717.
95. Putri RE, Kim LH, Farhat N, Felemban M, Saikaly PE, Vrouwenvelder JS. Evaluation of DNA extraction yield from a chlorinated drinking water distribution system. *PLoS one*. 2021 Jun 24; 16(6): e0253799. <https://doi.org/10.1371/journal.pone.0253799> PMID: 34166448
96. Cuatucci M., Ultrafiltration a cost-effective solution for treating surface water to potable standard. *Water Practice and Technology*. 2020 Jun 1; 15(2):426–36.
97. Ahmed K. Environmental policy stringency, related technological change and emissions inventory in 20 OECD countries. *Journal of environmental Management*. 2020 Nov 15; 274:111209. <https://doi.org/10.1016/j.jenvman.2020.111209> PMID: 32798847
98. Ojo TO, Baiyegunhi LJ. Determinants of credit constraints and its impact on the adoption of climate change adaptation strategies among rice farmers in South-West Nigeria. *Journal of Economic Structures*. 2020 Dec; 9(1):1–5.
99. Green JF. Does carbon pricing reduce emissions? A review of ex-post analyses. *Environmental Research Letters*. 2021 Mar 24; 16(4):043004.
100. Haans RF, Pieters C, He ZL. Thinking about U: Theorizing and testing U-and inverted U-shaped relationships in strategy research. *Strategic management journal*. 2016 Jul; 37(7):1177–95.
101. Sarkodie SA, Ozturk I. Investigating the environmental Kuznets curve hypothesis in Kenya: a multivariate analysis. *Renewable and Sustainable Energy Reviews*. 2020 Jan 1; 117:109481.



102. Murshed M, Alam R, Ansarin A. The environmental Kuznets curve hypothesis for Bangladesh: the importance of natural gas, liquefied petroleum gas, and hydropower consumption. *Environmental Science and Pollution Research*. 2021 Apr; 28(14):17208–27. <https://doi.org/10.1007/s11356-020-11976-6> PMID: 33394390
103. Erdogan S, Okumus I, Guzel AE. Revisiting the Environmental Kuznets Curve hypothesis in OECD countries: the role of renewable, non-renewable energy, and oil prices. *Environmental Science and Pollution Research*. 2020 Jul; 27(19):23655–63. <https://doi.org/10.1007/s11356-020-08520-x> PMID: 32297114
104. Suki NM, Sharif A, Afshan S, Suki NM. Revisiting the Environmental Kuznets Curve in Malaysia: The role of globalization in sustainable environment. *Journal of Cleaner Production*. 2020 Aug 10; 264:121669.
105. Giannetti BF, Agostinho F, Eras JC, Yang Z, Almeida CM. Cleaner production for achieving the sustainable development goals. *Journal of Cleaner Production*. 2020 Oct 20; 271:122127.
106. Akram R, Chen F, Khalid F, Ye Z, Majeed MT. Heterogeneous effects of energy efficiency and renewable energy on carbon emissions: Evidence from developing countries. *Journal of cleaner production*. 2020 Feb 20; 247:119122.
107. Bertheau P. Assessing the impact of renewable energy on local development and the Sustainable Development Goals: Insights from a small Philippine island. *Technological Forecasting and Social Change*. 2020 Apr 1; 153:119919.
108. Anser MK, Alharthi M, Aziz B, Wasim S. Impact of urbanization, economic growth, and population size on residential carbon emissions in the SAARC countries. *Clean Technologies and Environmental Policy*. 2020 May; 22(4):923–36.
